# Supplementary material for: Closed-Loop Insulin Therapy Improves Glycemic Control in Children Aged <7 Years: A randomized controlled trial
Source: PubMed Central journal article supplement — Diabetes Care. 2013 Jan 17;36(2):222–7. doi: 10.2337/dc12-1079 (PMC3554296; doi:10.2337/dc12-1079), 2013-01-17
Supplement: supp_dc12-1079v121079_DC121079SupplementaryData.pdf [file supp_dc12-1079v121079_DC121079SupplementaryData.pdf]

SUPPLEMENTARY DATA

Supplementary Figure 1.

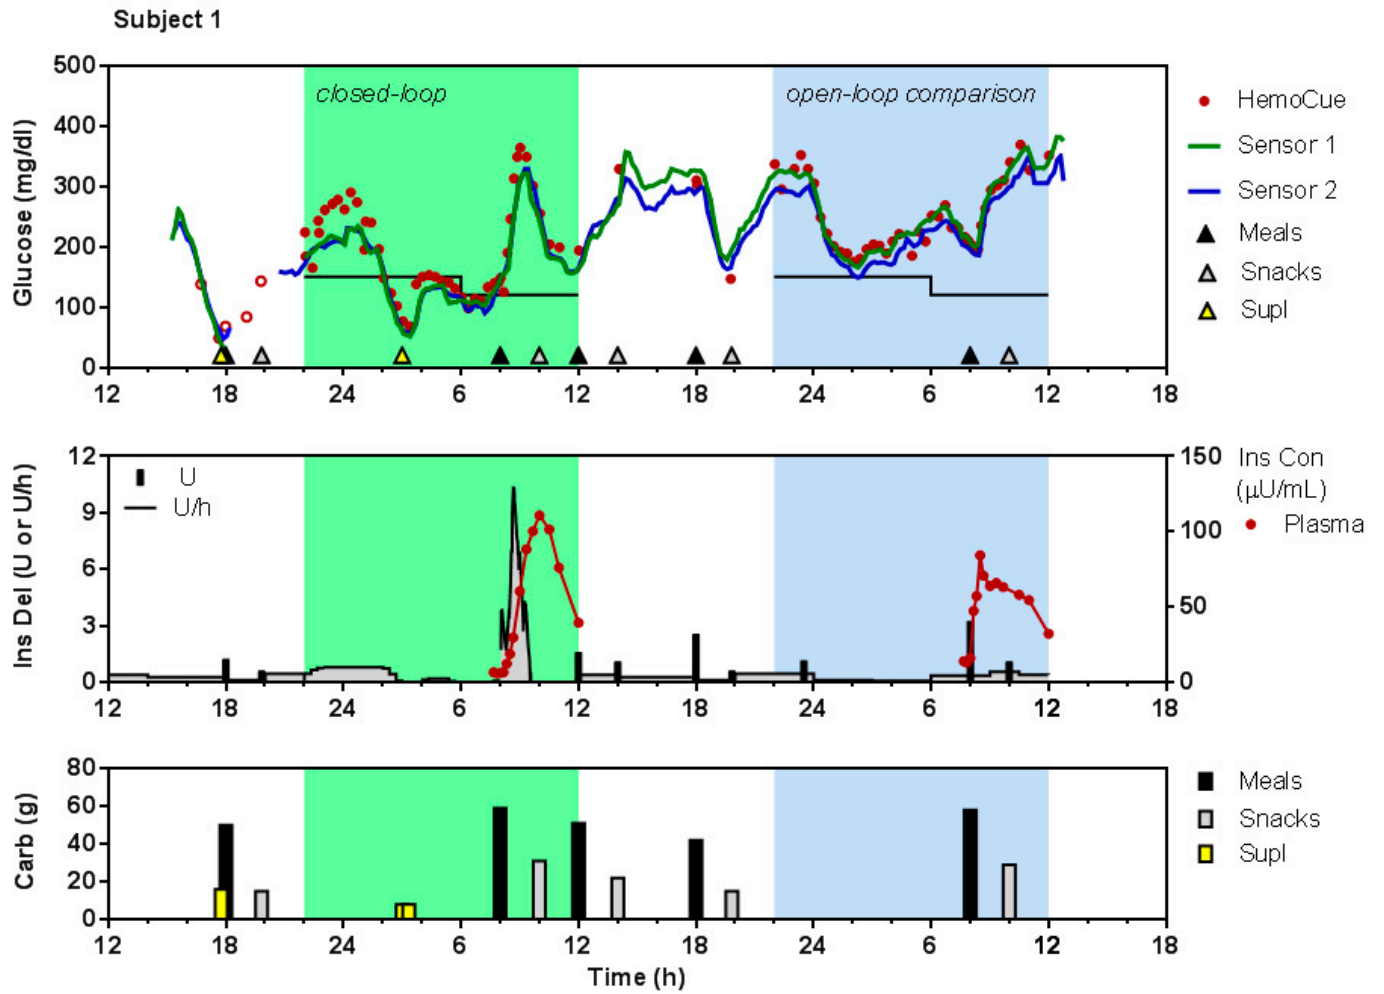

SUPPLEMENTARY DATA

Supplementary Figure 2.

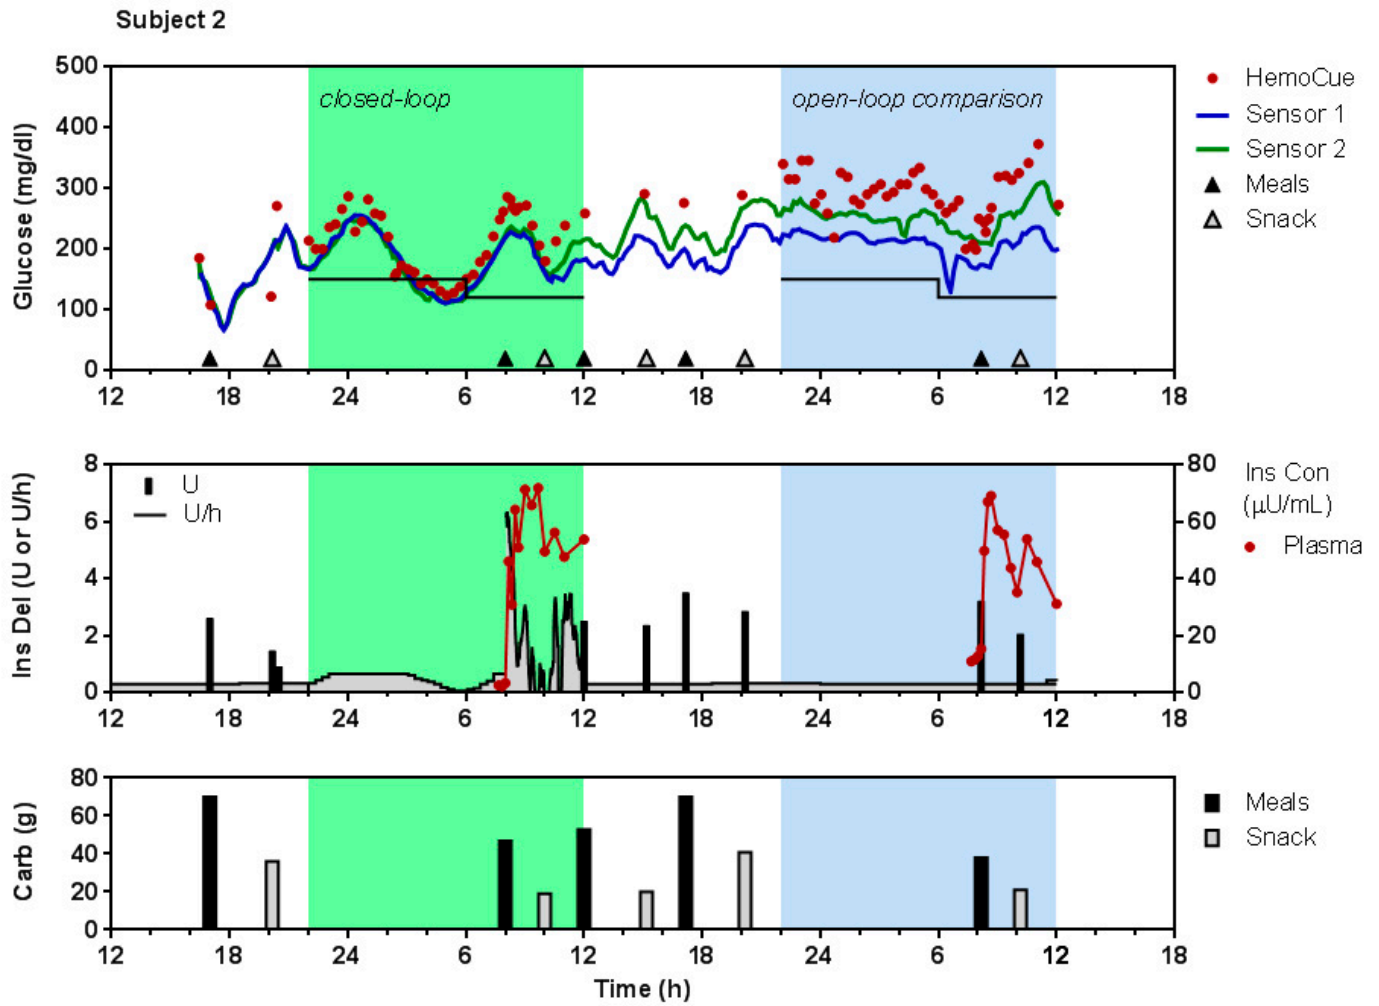

SUPPLEMENTARY DATA

Supplementary Figure 3.

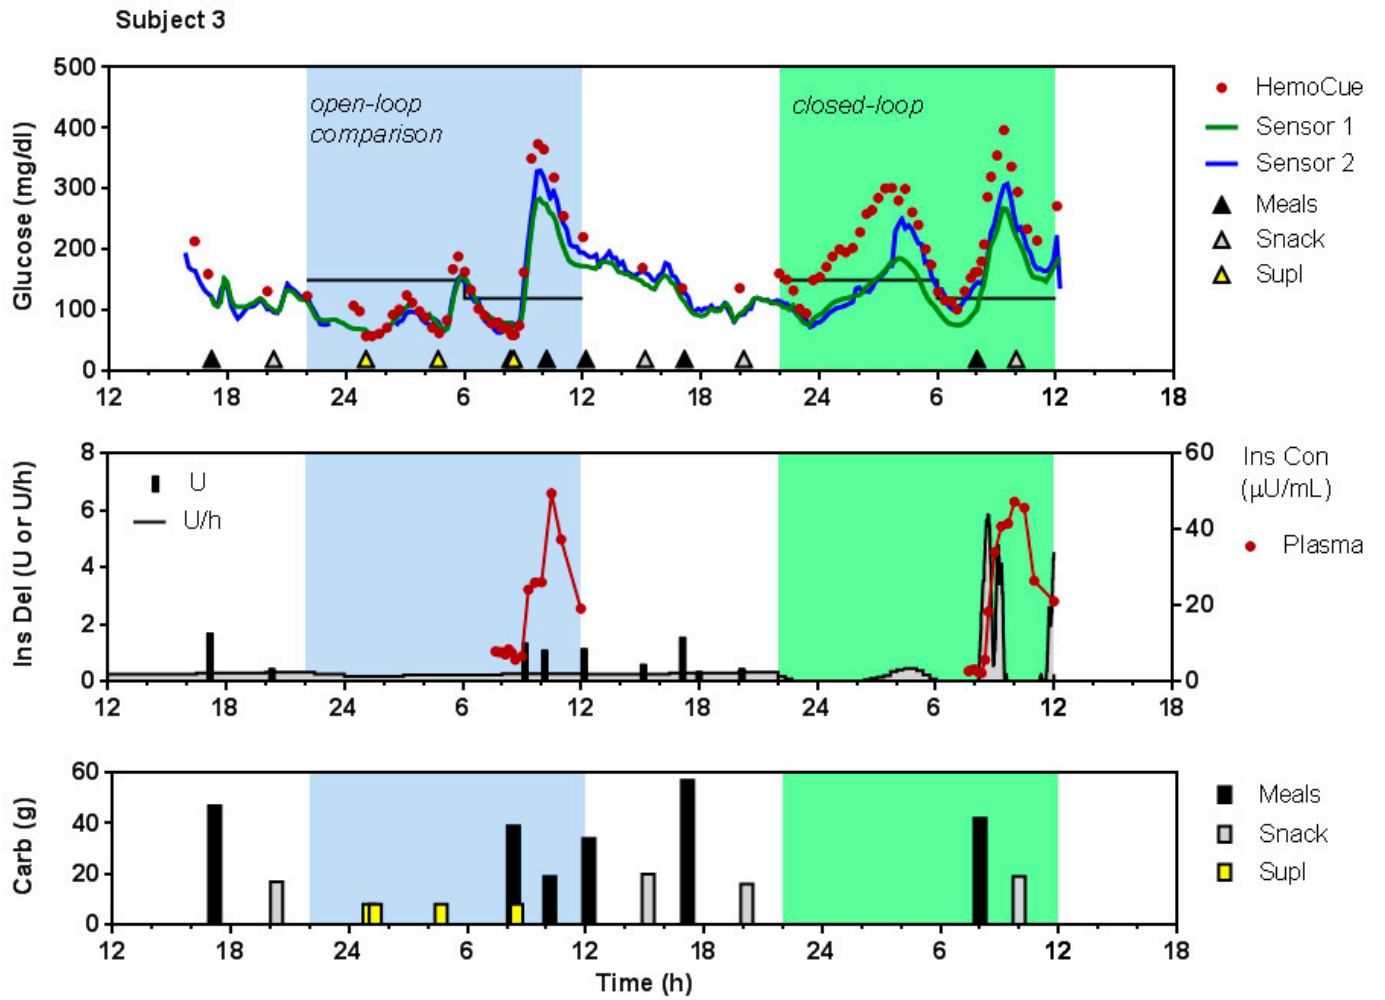

Supplementary Figure 4.

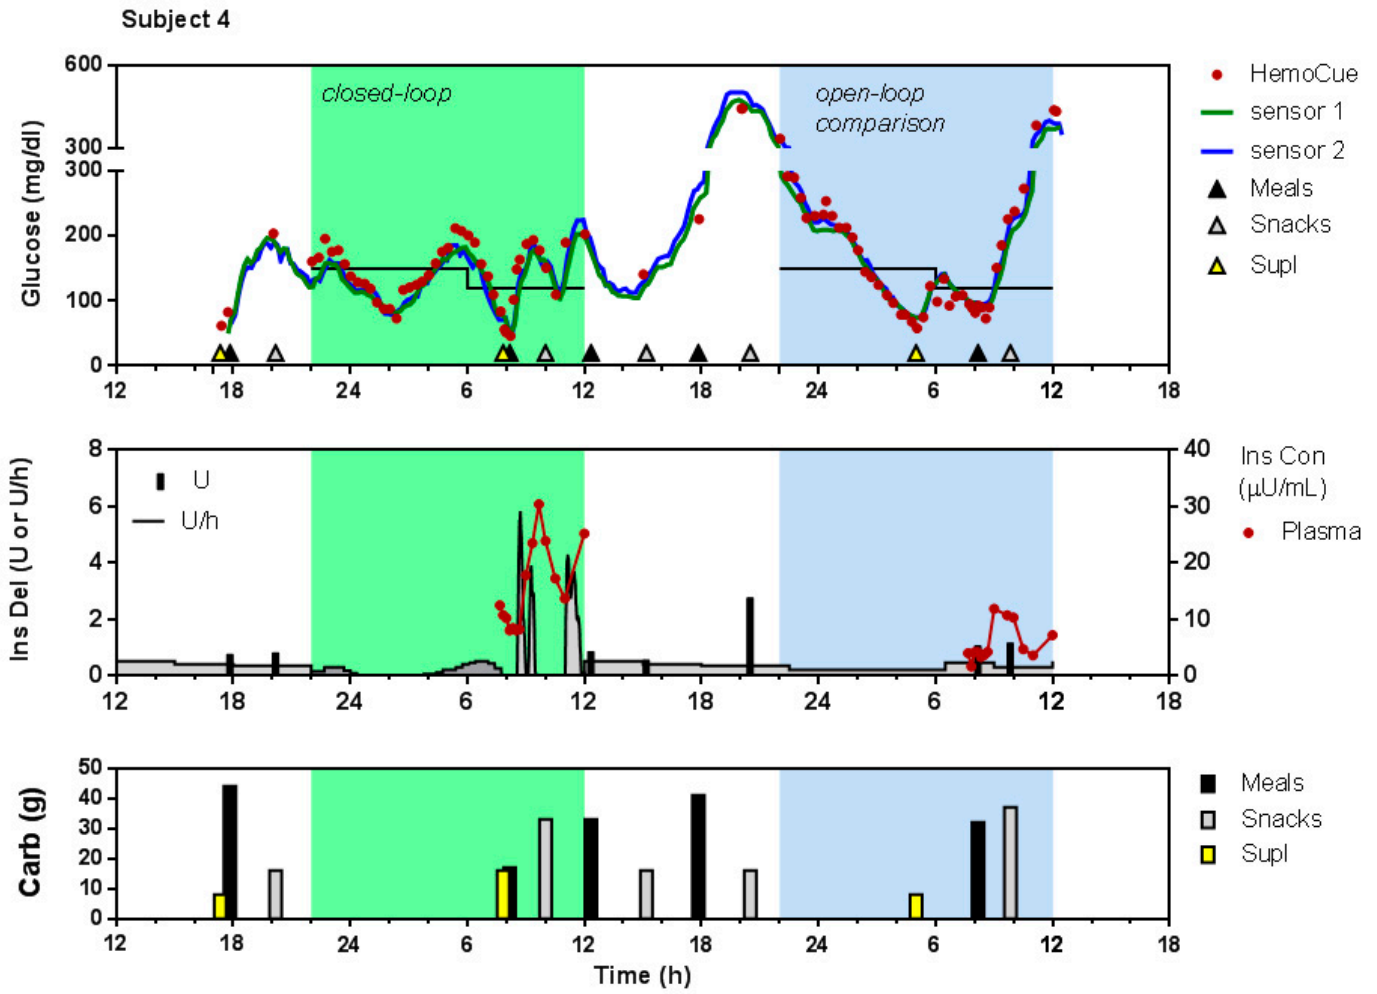

SUPPLEMENTARY DATA

Supplementary Figure 5.

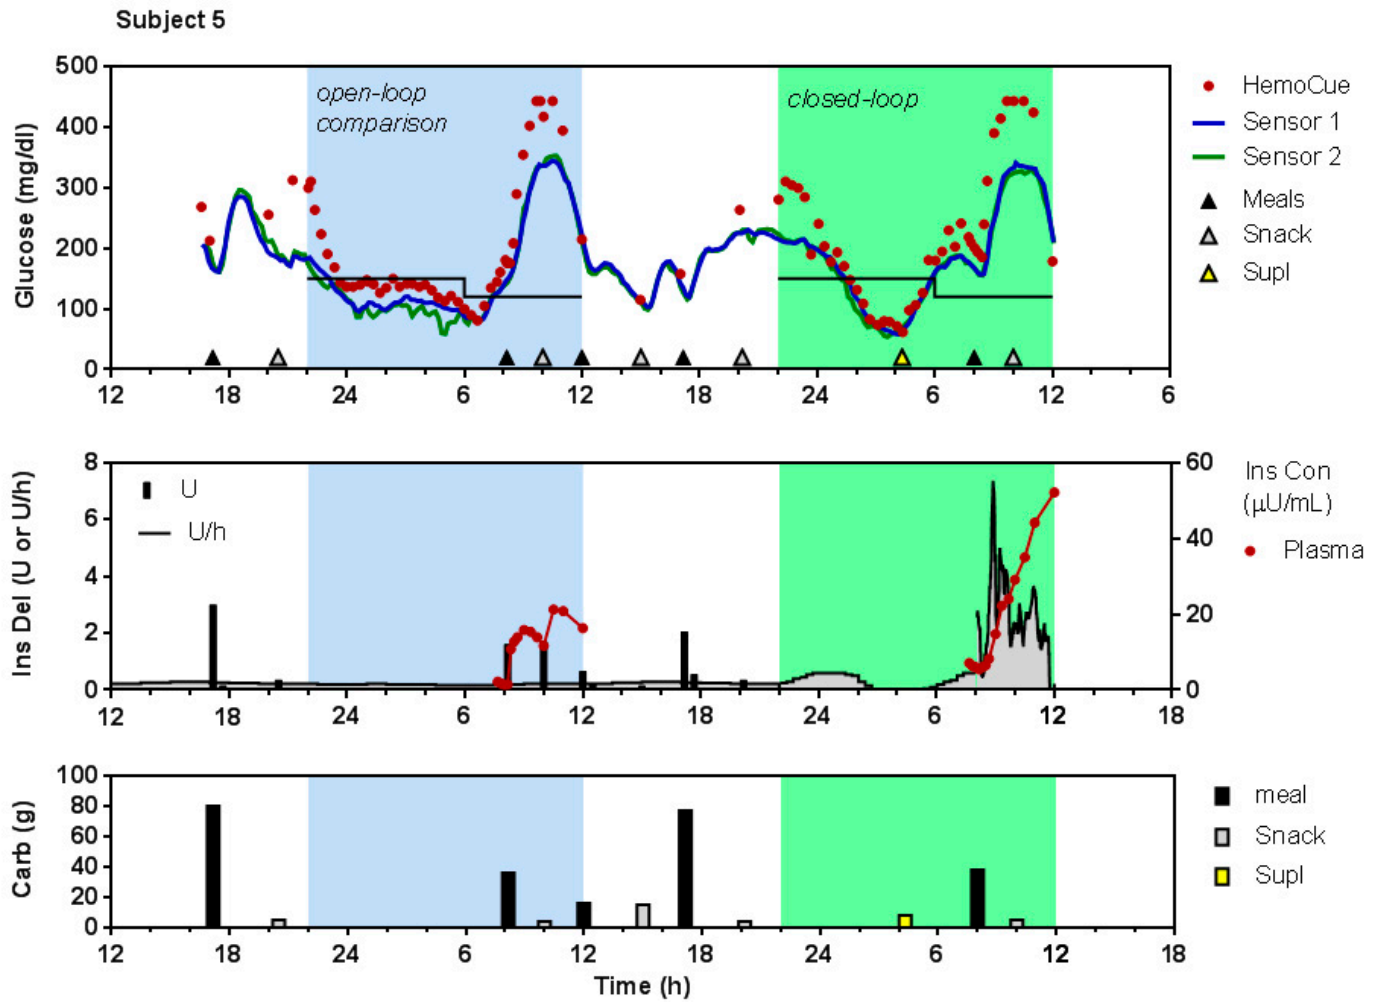

SUPPLEMENTARY DATA

Supplementary Figure 6.

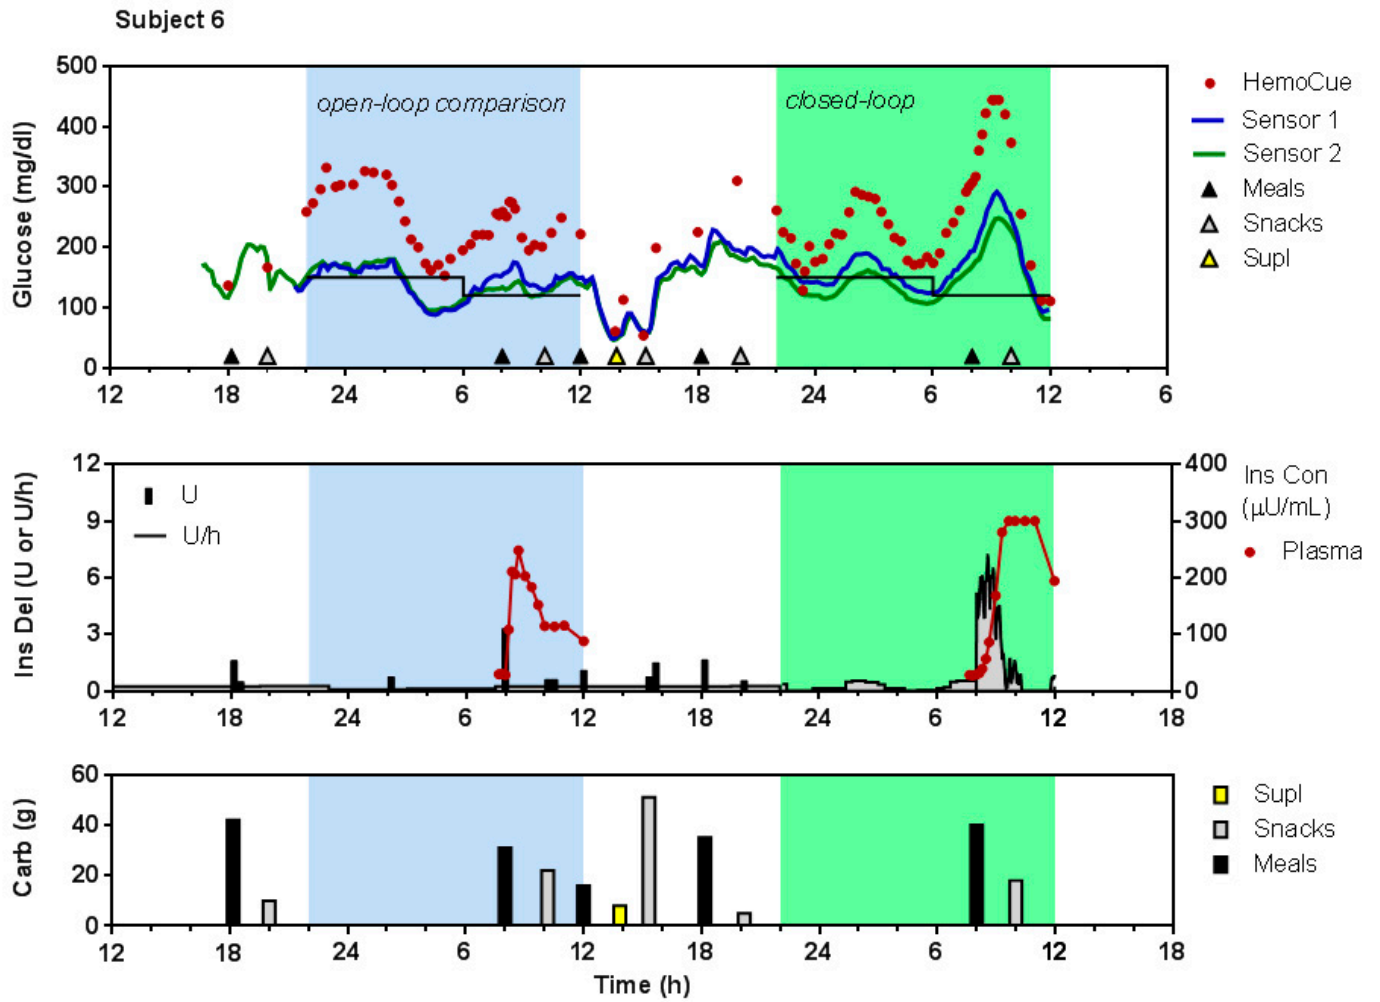

SUPPLEMENTARY DATA

Supplementary Figure 7.

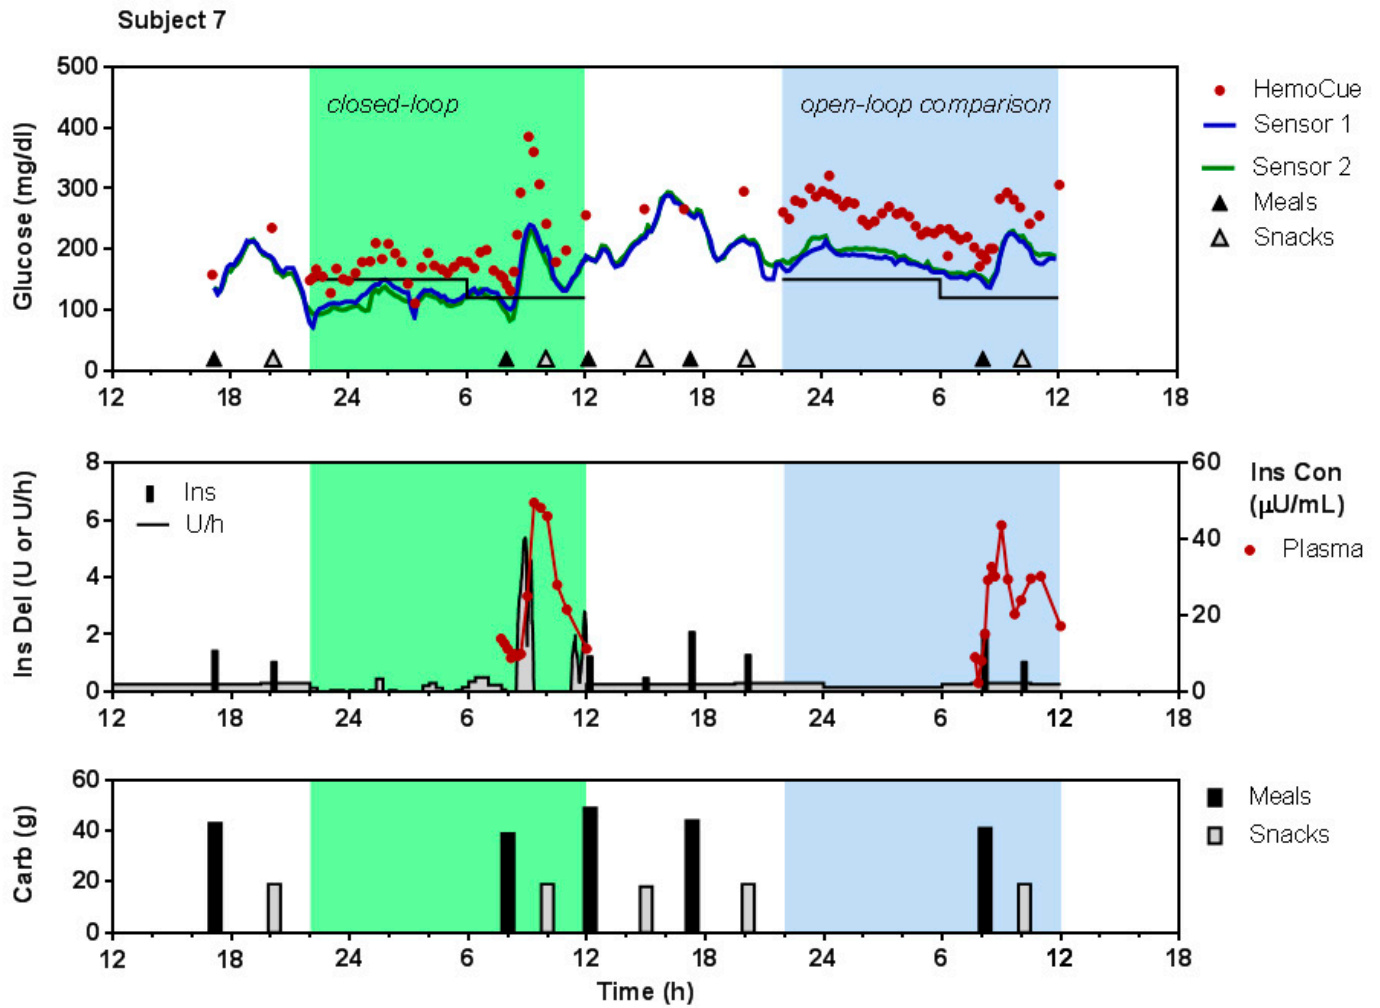

Supplementary Figure 8.

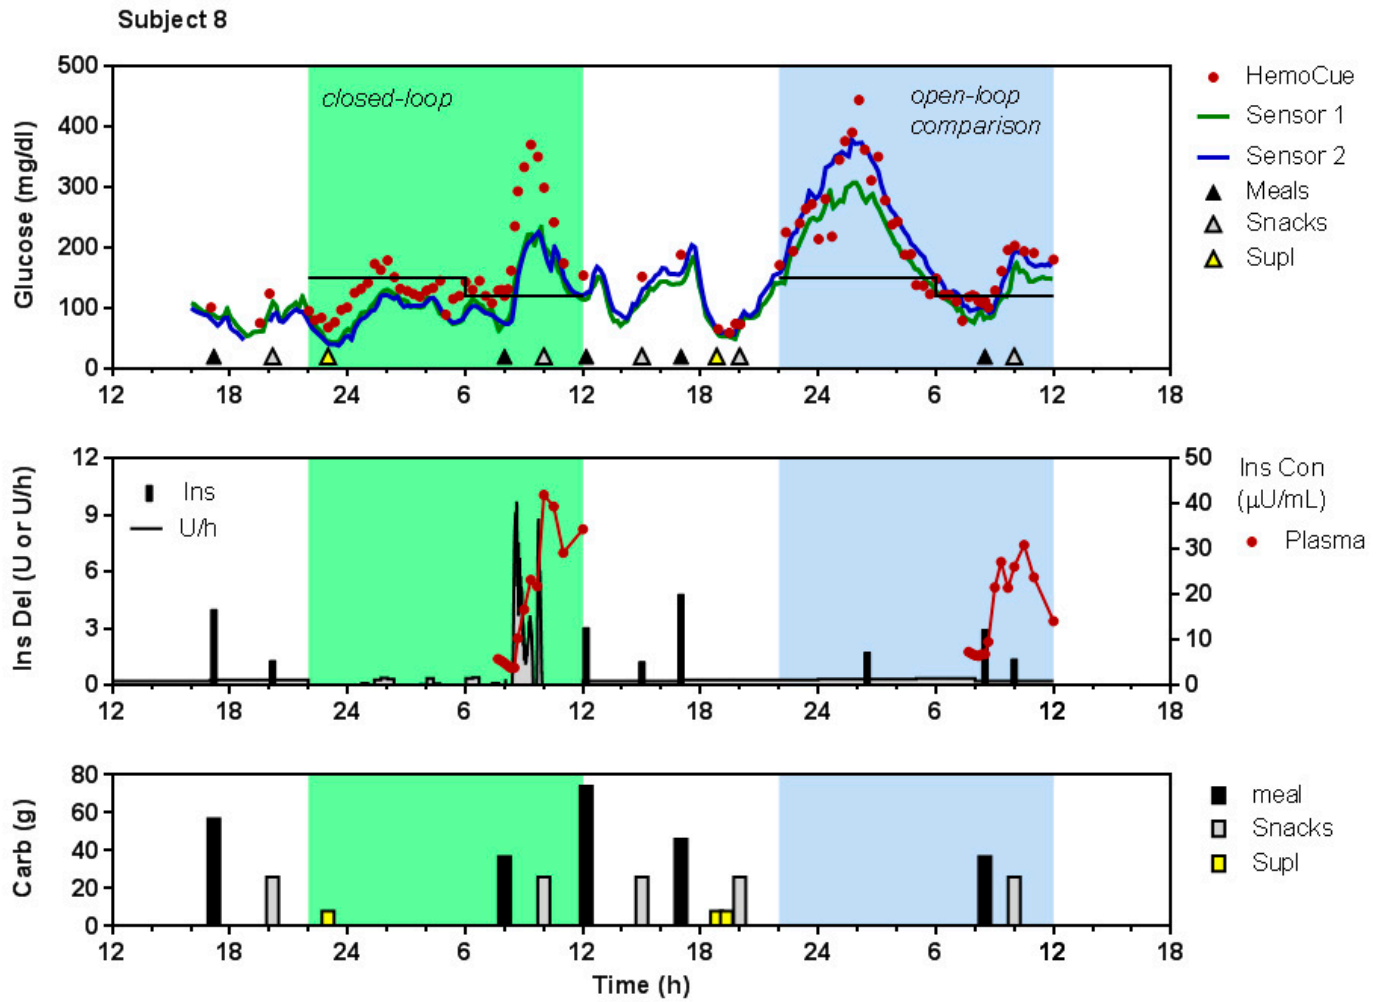



SUPPLEMENTARY DATA

Supplementary Figure 9.

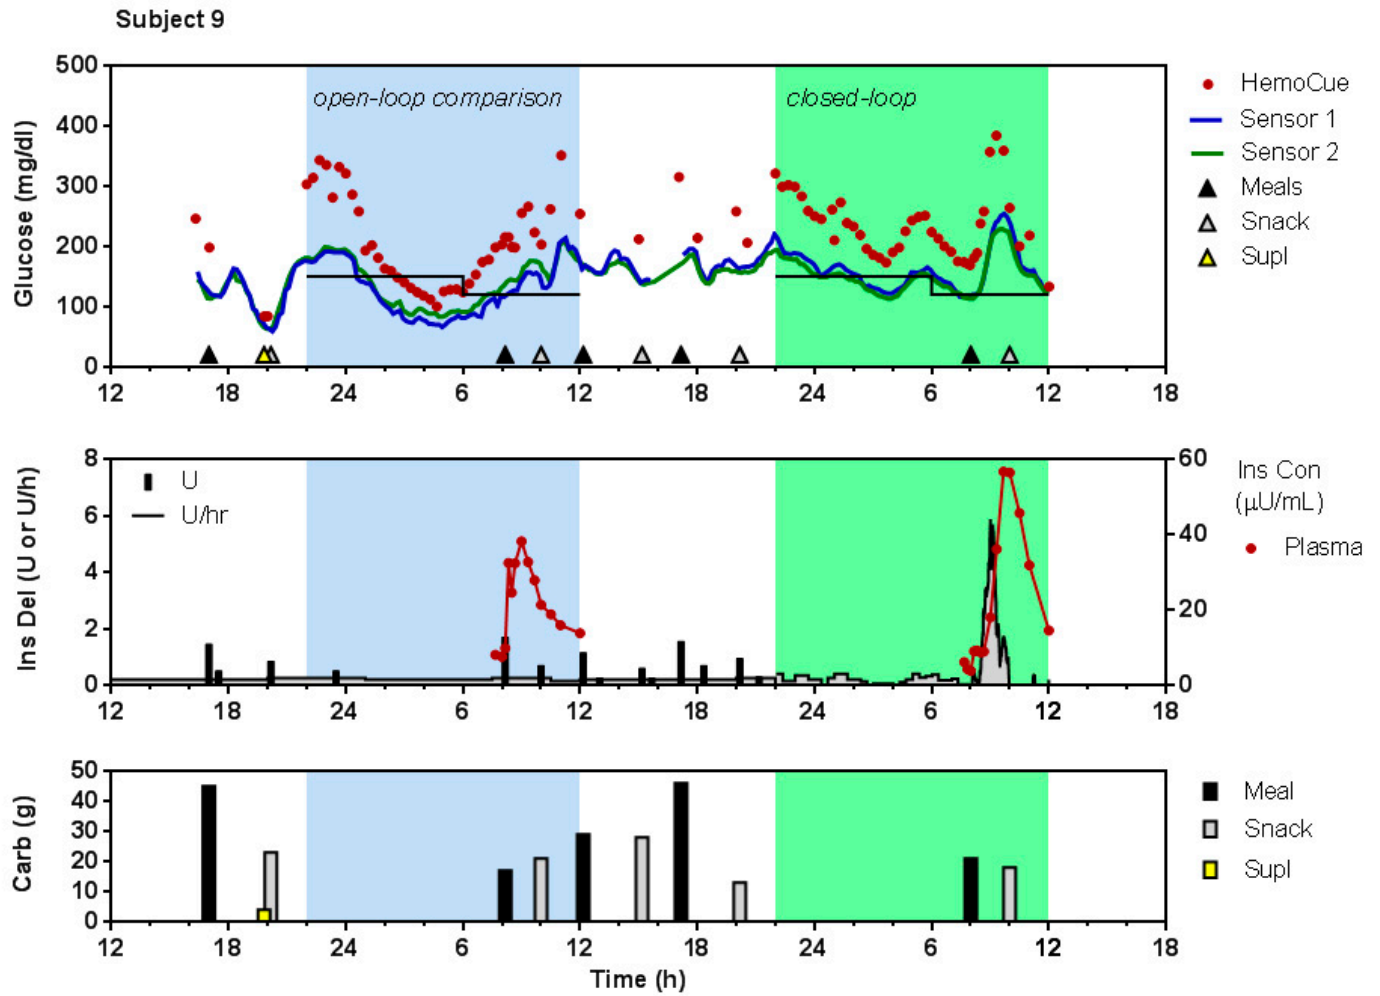

Supplementary Figure 10.

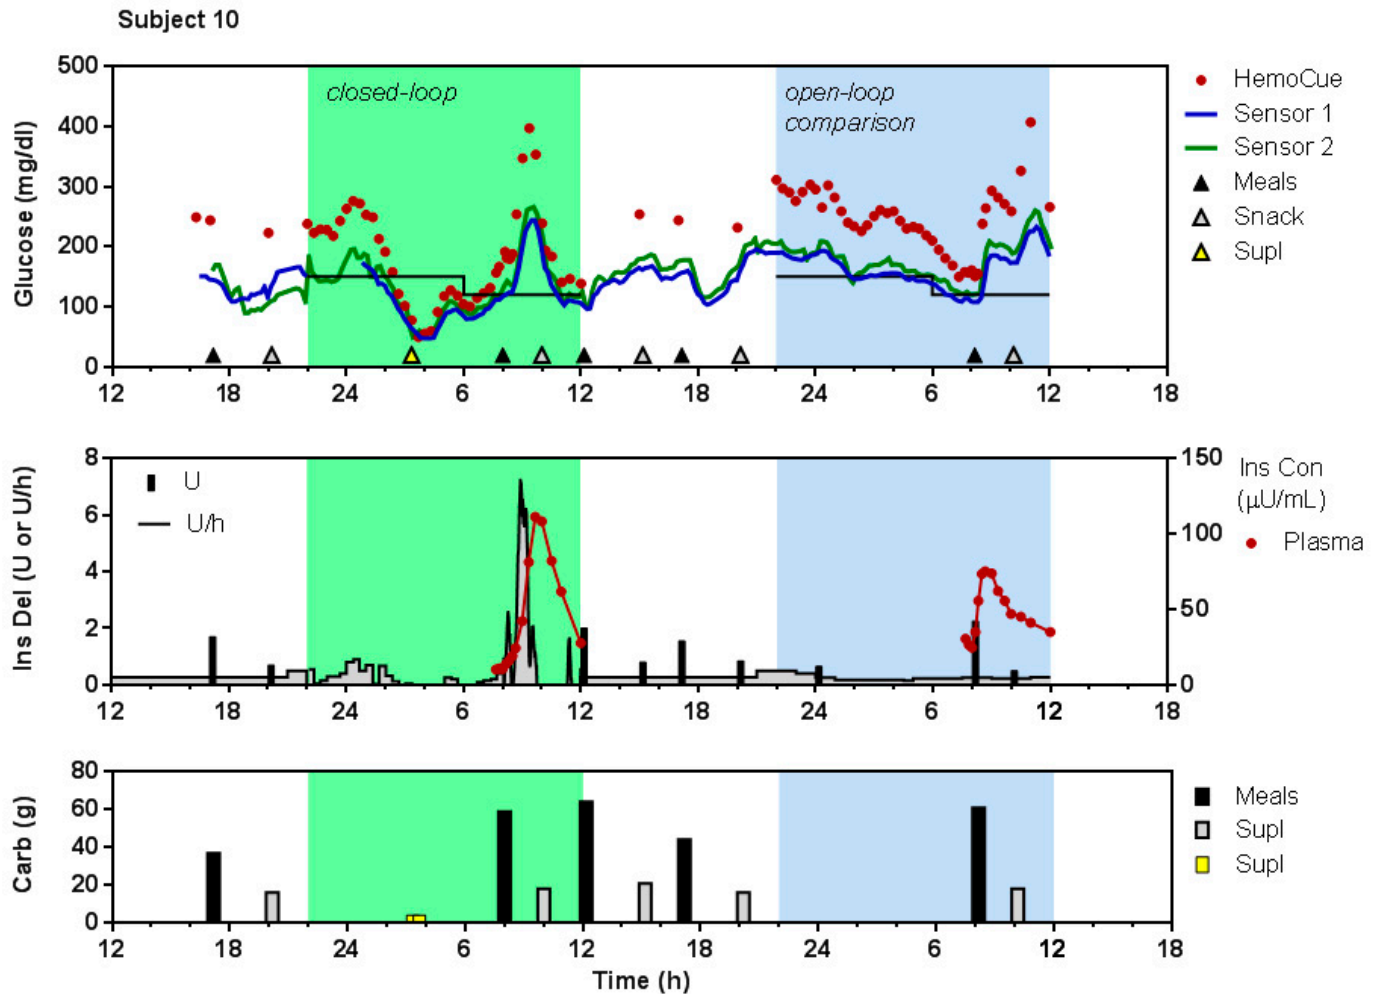

Supplementary Figures 1-10 depict the individual glucose, carbohydrate, and insulin profiles for all 10 subjects.

Top Panel: Red diamonds denote HemoCue<sup>®</sup> plasma glucose values. The blue and yellow lines represent the CGM readings with Sensor 1 (blue) denoting the sensor that was used to run the closed-loop algorithm. The study outcome periods are shaded in green for open-loop and light blue for closed-loop. Black triangles indicate meal times. Grey triangles indicate snack times. Yellow triangles indicate treatment with supplementary carbohydrates for hypoglycemia.

Middle Panel: Grey shaded area indicates insulin delivery (U per hr – left axis) during closed-loop therapy and basal rates during open-loop therapy. Black vertical bars represent open-loop insulin boluses (U – left axis). Red diamonds denote measured plasma insulin values (µU/mL – right axis).

Bottom Panel: Vertical bars represent carbohydrate intake in grams (Black – meals, Grey – Snacks, Yellow – Supplementary carbohydrates for hypoglycemia).
